# Supplementary material
Source: Springer Nature journal article supplement (https://www.springermedizin.de/resource/supplementary/12889_2010_2567_MOESM3_ESM.pdf/9486476)

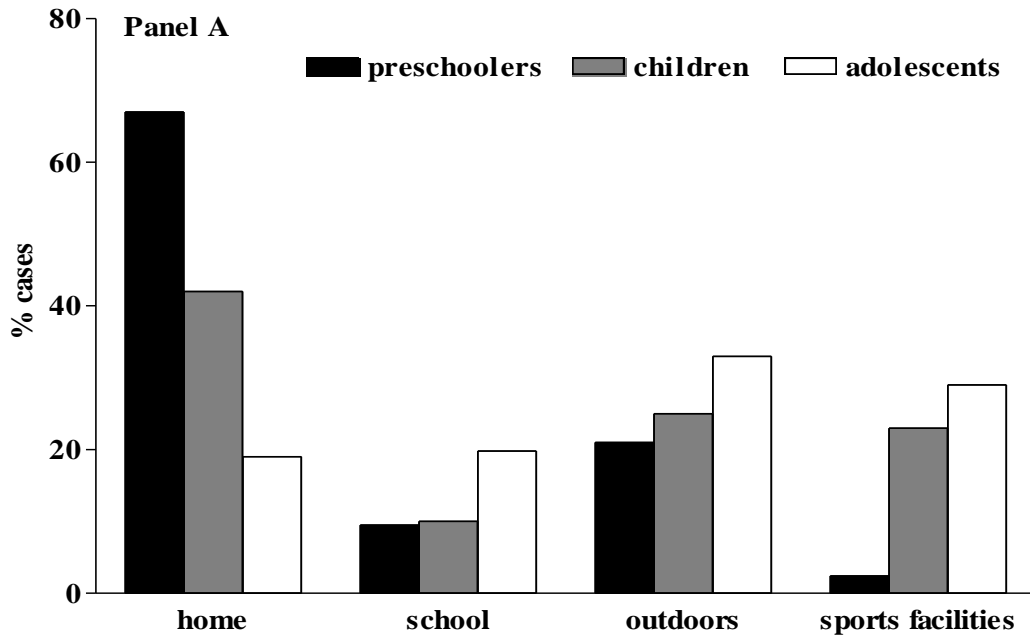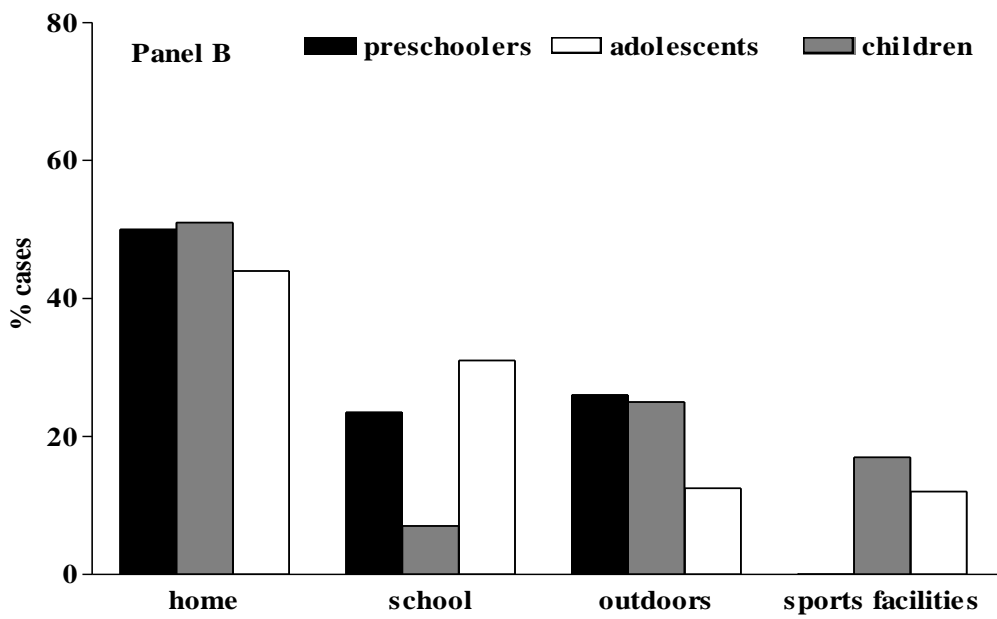

Figure 3

Supplement: MOESM3 [file 9486476]
